# Supplementary material
Source: Springer Nature journal article supplement (https://www.springermedizin.de/resource/supplementary/12967_2006_132_MOESM2_ESM.pdf/9575770)
Supplement: MOESM2 [file 9575770]

**Table 2: Biomarker genes in (a) the present melanoma component and (b) the original Ross *et al* cluster.**

**(a) Highest scoring genes from the present study melanoma component.**

| <b>Gene</b>                                   | <b>Component Regression Score</b> |
|-----------------------------------------------|-----------------------------------|
| <b>TYRP2 DCT DOPACHROME TAUTOMERASE *</b>     | <b>8.11</b>                       |
| <b>TYR TYROSINASE *</b>                       | <b>7.00</b>                       |
| <b>SKELETAL MUSCLE-SPECIFIC CALPAIN</b>       | <b>6.64</b>                       |
| <b>S-100 PROTEIN, BETA *</b>                  | <b>5.92</b>                       |
| <b>TYRP1 TYROSINASE-RELATED PROTEIN 1*</b>    | <b>5.59</b>                       |
| <b>DDS1BETA PROTEIN</b>                       | <b>5.56</b>                       |
| <b>ACP5 ACID PHOSPHATASE TYPE 5*</b>          | <b>5.32</b>                       |
| <b>QPCT GLUTAMINYL CYCLASE</b>                | <b>5.30</b>                       |
| <b>ENDOTHELIN RECEPTOR TYPE B</b>             | <b>4.95</b>                       |
| <b>EDRA3 CAGH3 *</b>                          | <b>4.71</b>                       |
| <b>BCHE BUTYRYLCHOLINESTERASE*</b>            | <b>4.51</b>                       |
| <b>HTMART MONO-ADP-RIBOSYLTRANSFERASE</b>     | <b>4.23</b>                       |
| <b>GALECTIN 3</b>                             | <b>3.90</b>                       |
| <b>RXRG RETINOID X RECEPTOR GAMMA *</b>       | <b>3.86</b>                       |
| <b>MBP MYELIN BASIC PROTEIN*</b>              | <b>3.76</b>                       |
| <b>CLASS II HISTOCOMPATIBILITY ANTIGEN, M</b> | <b>3.70</b>                       |
| <b>BILIARY GLYCOPROTEIN</b>                   | <b>3.58</b>                       |
| <b>DGCR6 PROTEIN</b>                          | <b>3.56</b>                       |
| <b>SIAT8A ALPHA2,8-SIALYLTRANSFERASE *</b>    | <b>3.48</b>                       |
| <b>A2M ALPHA-2-MACROGLOBULIN*</b>             | <b>3.47</b>                       |
| <b>MART-1*</b>                                | <b>3.45</b>                       |
| <b>MUTYH MUTY HOMOLOG *</b>                   | <b>3.42</b>                       |
| <b>SCRAPIE RESPONSIVE PROTEIN 1*</b>          | <b>3.22</b>                       |
| <b>FARNESYLTRANSFERASE</b>                    | <b>3.18</b>                       |
| <b>CLATHRIN COAT ASSEMBLY PROTEIN AP19</b>    | <b>3.18</b>                       |
| <b>CMP-N-ACETYLNEURAMINATE</b>                | <b>3.10</b>                       |

**\* Genes also found in Ross et al original cluster listed below**

**(b) Genes included in the Ross *et al* original melanoma cluster**

**CMOAT**  
**G2PROTEIN**  
**PTPRZ1 TYROSINE PHOSPHATASE ZETA**  
**MBP MYELIN BASIC PROTEIN\***  
**BCHE BUTYRYLCHOLINESTERASE\***

**SCRAPIE RESPONSIVE PROTEIN 1\***  
**ART3 MONO-ADP-RIBOSYLTRANSFERASE**  
**SIAT6 ALPHA2,3-SIALYLTRANSFERASE**  
**ACP5 ACID PHOSPHATASE TYPE 5\***  
**RXRG RETINOID X RECEPTOR GAMMA\***  
**TYRP2 DCT DOPACHROME TAUTOMERASE\***  
**TYR TYROSINASE\***  
**MUTYH MUTY HOMOLOG\***  
**S100B S-100 BETA\***  
**EDNRB ENDOTHELIN RECEPTOR TYPE B**  
**TYRP1 TYROSINASE-RELATED PROTEIN 1\***  
**SIAT8A ALPHA2,8-SIALYLTRANSFERASE\***  
**MELANOMA ANTIGEN RECOGNIZED BY T-CELLS (MART-1)\***  
**GM6B**  
**PDNP2 NUCEOTIDE PYROPHOSPHATASE 2**  
**EDRA3 CAGH3\***  
**CPB2 PLASMA CARBOXYPEPTIDASE B**  
**LGALS3BP GALECTIN-6 BINDING PROTEIN**  
**A2M ALPHA-2-MACROGLOBULIN\***  
**AACT ALPHA-1-ANTICHYMOTRYPSIN**  
**LAMA4 LAMININ ALPHA 4**

**\* Genes also found in present Melanoma Cluster**
